# Supplementary material for: Comparison of IAA and amino acid profiles of the selected rootstocks and their accumulation in grafted scion of Cucumis sativus L
Source: PeerJ. 2025 Oct 15;13:e20159. doi: 10.7717/peerj.20159 (PMC12535229; doi:10.7717/peerj.20159)
Supplement: Supplemental Information 7 [file peerj-13-20159-s007.xlsx]

## Sheet: AA in Cucurbitceae
	Species	C. ficifolia				C. moschata				C. pepo				C. maxima
	Lifespan	2 weeks		4 weeks		2 weeks		4 weeks		2 weeks		4 weeks		2 weeks		4 weeks
	Organ	stem	leaf	stem	leaf	stem	leaf	stem	leaf	stem	leaf	stem	leaf	stem	leaf	stem	leaf
	Aspartic acid	277.5	634.1	439.1	783.2	323.1	426.6	558.9	915	229	449.1	509.4	1495.3	196.2	1139	296.2	1510.2
	Glutamic acid	57.5	106.9	494	742.7	90.6	298.4	483	1995.8	298.6	751.2	639	1432.1	296.8	1197.3	568.4	1977
	Serine	30.1	50.3	66.5	150.9	29.7	94.5	73.4	347.1	54.7	60.4	66	79.1	26.9	62.2	81.5	229.2
	Asparagine	87.1	187.6	169.4	280.8	85.8	474.4	98.1	506.4	133	250.7	148.8	273.8	92.5	277.2	215.4	512.3
	Histidine	61.6	125.9	111.9	166.8	97	170.4	95.7	402.4	105.9	158.3	175.3	182.6	72.5	255.6	221.1	366.6
	Arginine	3994.3	4352.2	5280.2	7015	2264.3	3231	3419.1	19993.3	3739.5	4866	9174.6	21756.6	2373.1	4577.3	11677.5	13921.8
	Threonine	133.8	172.7	189	211.1	60.1	479.9	191	819.1	106.5	151.5	197.5	339.3	78.8	284.1	323.4	470.7
	Alanine	165.3	304.2	219.2	477.8	69.8	106.2	117.7	186.7	189.1	336.9	191	504	106.8	203.9	131	241.6
	Proline	29.7	33.9	43.3	55.5	29.2	78.9	46.3	203.5	26.3	30.9	46.3	47.9	34.3	88.6	50.9	97.2
	Cysteine	0.2	0.6	1.1	25.7	1.4	29.2	11.3	140	15.2	26.6	25.8	143.6	1.1	15.4	22.4	35
	Tyrosine	40.3	56.2	136.3	179.1	61.3	96.2	172.6	314.2	79.2	105.5	101.8	169.6	123.9	183.3	214.5	271.3
	Valine	56.3	62.6	90.8	107.6	49.6	74.5	98.5	256.7	64.5	80.6	108.8	142.2	76.6	173.8	123.6	288.8
	Methionine	63.5	143.8	107.1	183.8	62.6	122.9	131.2	312.9	57.6	180.3	138	213	39	124.6	238.2	322.2
	Cystine	154.8	233.9	448.2	517.3	124.8	189.7	402.6	852.9	436.2	165.7	460.8	492.4	236.8	284.1	277.6	1061.7
	Isoleucine	113.6	266.5	158.6	399.3	108.8	265.4	262	503	133.6	252.8	261.9	370.4	167.4	211.8	412.4	513.8
	Leucine	49.8	168.4	162.3	229.9	42.1	198.1	457.6	895.4	73.5	90.8	187.4	240.2	91.3	113.2	286.9	442.6
	Phenylalanine	138.4	205.1	254.3	266.2	56.9	264.8	134.7	629.4	226.4	384.3	342.9	528.1	183.4	270.7	484.4	680.7
	Lysine	34.4	51.5	48.1	77.1	24.6	42.7	61.5	130	41.3	64.4	97.2	140.2	52.9	95.6	64.7	189.8

## Sheet: IAA in cucurbits
		2 weeks									2 weeks	Average	Average	SD	SD
		Stem	Stem	Stem	Stem	Leaf	Leaf	Leaf	Leaf			Stem	Leaf	Stem	Leaf
	C.ficifolia	0	0	0	0	0.025	0.03	0.031	0.032		C.ficifolia	0	0.0295	0	0.00287849
	C.moschata	0	0	0	0	0.02	0.05	0.03	0.028		C.moschata	0	0.032	0	0.011808
	C.pepo	0.02	0.015	0.018	0.019	0.08	0.1	0.06	0.075		C.pepo	0.018	0.07875	0.002	0.0152947
	C.maxima	0.03	0.019	0.025	0.029	0.1	0.12	0.11	0.09		C.maxima	0.02575	0.105	0.00462138	0.0119523
		4 weeks									4 weeks	Average	Average	SD	SD
		Stem	Stem	Stem	Stem	Leaf	Leaf	Leaf	Leaf			Stem	Leaf	Stem	Leaf
	C.ficifolia	0.08	0.1	0.09	0.06	0.18	0.15	0.16	0.17		C.ficifolia	0.0825	0.17	0.0158114	0.0119523
	C.moschata	0.07	0.09	0.075	0.06	0.16	0.18	0.17	0.17		C.moschata	0.07375	0.3075	0.0115728	0.00755929
	C.pepo	0.08	0.075	0.085	0.06	0.35	0.29	0.31	0.28		C.pepo	0.075	0.3075	0.01	0.0286606
	C.maxima	0.1	0.12	0.095	0.089	0.4	0.35	0.38	0.37		C.maxima	0.101	0.375	0.0124442	0.0192725

## Sheet: Amino acids grafted
			1st repeat	2nd repeat	3rd repeat	4th repeat	1st repeat	2nd repeat	3rd repeat	4th repeat			2 weeks	Average	Average	SD
		2 weeks	Control	Control	Control	Control	Grafted	Grafted	Grafted	Grafted				Control	Grafted	Control dev	Grafted dev
		Pro	6.7	8.04	7.169	7.303	6.3	7.245	6.489	6.615			Pro	7.303	6.66225	0.514013	0.379123
		Cys	7.6	9.12	8.132	8.284	7.5	8.625	7.725	8.475			Cys	8.284	8.08125	0.58306	0.511432
		Lys	9.9	11.088	10.593	10.395	11	12.32	11.715	11.88			Lys	10.494	11.7287	0.455215	0.508139
		Val	18.2	18.382	19.474	19.11	18.8	20.304	20.022	21.244			Val	18.7915	20.0925	0.556728	0.932923
		Asn	17.2	24.08	18.404	18.92	18.3	22.875	18.849	19.398			Asn	19.651	19.8555	2.81388	1.90932
		Phe	19.9	22.288	21.293	20.895	18	20.7	19.17	19.44			Phe	21.094	19.3275	0.915029	1.02588
		Iso	28.6	32.032	30.602	30.03	28.4	31.808	30.246	32.092			Iso	30.316	30.6365	1.31507	1.57165
		Thr	32.2	45.08	34.454	35.42	32	40	32.96	33.6			Met	36.7885	34.64	5.26785	3.36381
		Met	30.8	31.108	32.956	32.34	31.1	33.588	33.1215	35.143			Thr	31.801	33.2381	0.942155	1.54329
		Ser	37.3	45	39.911	41.03	36.8	46	37.904	39.008			Ser	40.8102	39.928	2.96324	3.83951
		Leu	38	42.56	40.66	39.9	39.1	44.965	41.6415	42.228			Leu	40.28	41.9836	1.74729	2.22843
		Tyr	30.1	36.12	32.207	32.809	41.5	47.725	42.745	46.895			Tyr	32.809	44.7163	2.30922	2.82992
		Asp	39	54.6	41.73	42.9	42.6	53.25	43.878	45.156			Asp	44.5575	46.221	6.38032	4.44466
		Cy	49	54.88	52.43	51.45	52.2	56.376	55.593	58.986			Ala	51.94	55.7888	2.25309	2.59035
		Ala	49	58.8	52.43	53.41	50.6	58.19	52.118	53.13			Cy	53.41	53.5095	3.7592	3.04502
			1st repeat	2nd repeat	3rd repeat	4th repeat	1st repeat	2nd repeat	3rd repeat	4th repeat			2 weeks	Average	Average	SD	SD
		2 weeks	Control	Control	Control	Control	Grafted	Grafted	Grafted	Grafted				Control	Grafted	Control dev	Grafted dev
		Glu	87.4	120	93.518	91.77	82.5	92.4	87.8625	110			Glu	98.172	93.1906	13.6815	11.0306
		Arg	198.1	221.872	250	208.005	199.7	223.664	212.68	209.685			Arg	219.494	211.432	20.8804	9.13193
		His	780.9	874.608	835.563	819.945	781.2	820	831.978	760			His	827.754	798.294	35.9068	31.0041
		4 weeks	1st repeat	2nd repeat	3rd repeat	4th repeat	1st repeat	2nd repeat	3rd repeat	4th repeat			4 weeks	Average	Average	SD	SD
		4 weeks	Control	Control	Control	Control	Grafted	Grafted	Grafted	Grafted				Control	Grafted	Control dev	Grafted dev
		Pro	16.7	17.702	18.871	17.869	16.9	17.745	18.59	17.745			Pro	17.7855	17.745	0.822985	0.63876
		Cys	23.2	24.592	26.216	24.824	24.4	25.62	26.84	25.62			Cys	24.708	25.62	1.14331	0.922233
		Lys	23.3	24.698	26.329	24.931	26.5	27.825	29.15	27.825			Lys	24.8145	27.825	1.14824	1.00161
		Val	45.7	48.442	51.641	48.899	59.7	62.685	65.67	62.685			Val	48.6705	62.685	2.25212	2.25645
		Asn	49.5	52.47	55.935	52.965	53.7	56.385	59.07	56.385			Asn	52.7175	56.385	2.43939	2.02967
		Phe	33.3	35.298	37.629	35.631	33.4	35.07	36.74	35.07			Phe	35.4645	35.07	1.64104	1.2624
		Iso	60.8	64.448	68.704	65.056	70.7	74.235	77.77	74.235			Iso	64.752	74.235	2.99626	2.67221
		Thr	80.5	85.33	90.965	86.135	113.4	119.07	124.74	119.07			Thr	85.7325	119.07	3.96708	4.28612
		Met	58	61.48	65.54	62.06	58.8	61.74	64.68	61.74			Met	61.77	61.74	2.85827	2.22243
		Ser	90.6	96.036	102.378	96.942	90.5	95.025	99.55	95.025			Ser	96.489	95.025	4.46482	3.42058
		Leu	104.2	110.452	117.746	111.494	105	110.25	115.5	110.25			Leu	110.973	110.25	5.13503	3.96863
		Tyr	78.1	82.786	88.253	83.567	156.9	164.745	172.59	164.745			Tyr	83.1765	164.745	3.84881	5.93026
		Asp	115.9	122.854	130.967	124.013	123.6	129.78	135.96	129.78			Asp	123.434	129.78	5.71161	4.67164
		Cy	122.1	129.426	137.973	130.647	145.1	152.355	159.61	152.355			Cy	130.036	152.355	6.01715	5.48426
		Ala	127.8	135.468	144.414	136.746	184.7	193.935	203.17	193.935			Ala	136.107	193.935	6.29805	6.981
													4 weeks	Average	Average	SD	SD
		4 weeks	1st repeat	2nd repeat	3rd repeat	4th repeat	1st repeat	2nd repeat	3rd repeat	4th repeat				Control	Grafted	Control dev	Grafted dev
		Glu	259.7	275.282	293.461	277.879	244.3	256.515	268.73	256.515			Glu	276.581	256.515	12.7982	9.23367
		Arg	556.8	590.208	629.184	595.776	715.6	751.38	787.16	751.38			Arg	592.992	751.38	27.4394	27.0471
		His	2255.3	2390.62	2548.49	2413.17	2399.6	2519.58	2639.56	2519.58			His	2401.89	2519.58	111.142	90.6964

## Sheet: IAA grafted
		IAA content							Average	Average	SD
		2 weeks							2 weeks	4 weeks	2 weeks	4 weeks
		1st repat	2nd repat	3rd repat	4th repat			Control	0.0165	0.05875	0.00287849	0.00790569
	Control	0.015	0.018	0.02	0.013			Grafted	0.01975	0.08175	0.00218763	0.00514782
	Grafted	0.018	0.023	0.02	0.018
		4 weeks
		1st repat	2nd repat	3rd repat	4th repat
	Control	0.06	0.07	0.05	0.055
	Grafted	0.08	0.09	0.079	0.078

## Sheet: Yield performance
			Grafted
		Amount of fruits per m2	Amount of fruits per plant	Fruits per m2,kg	Fruits per plant, kg	Fruit, g	Plant height,cm
	Repeat 1	178	14.8333	16.65	1.3875	93.5393	312
	Repeat 2	151	12.5833	13.8	1.15	91.3907	298
	Repeat 3	203	16.9167	18.4	1.53333	90.6404	300
	Repeat 4	172	14.3333	17.84	1.48667	103.721	295
	Average	176	14.6667	16.6725	1.38937	94.8228	301.25
	Error	19.8134	1.65112	1.8973	0.158108	5.60856	6.90238
			Control
		Amount of fruits per m2	Amount of fruits per plant	Fruits per m2,kg	Fruits per plant, kg	Fruit, g	Plant height,cm
	Repeat 1	129	10.75	11.81	0.984167	91.5504	250
	Repeat 2	144	12	13.89	1.1575	96.4583	255
	Repeat 3	152	12.6667	13.08	1.09	86.0526	251
	Repeat 4	131	10.9167	12.32	1.02667	94.0458	259
	Average	139	11.5833	12.775	1.06458	92.0268	253.75
	Error	10.924	0.910332	0.908203	0.0756836	4.45842	4.11299
